# Supplementary material for: Ni-introduced CuAu nanocages: facile co-reduction synthesis of a novel magnetic multi-metallic nanostructure with high peroxidase mimetic activity
Source: Royal Society of Chemistry journal article supplement (doi:10.1039/c7ce02165h), 2018-01-01
Supplement: c7ce02165h1.pdf [file c7ce02165h1.pdf]

## Synthesis of octahedral Cu<sub>2</sub>O/Au nanocomposites

Cu<sub>2</sub>O/Au nanocomposites were prepared as a comparison experiment. 10 mg of Cu<sub>2</sub>O octahedral was dispersed in 20mL of distilled water under ultrasonication for 10min. After that, 0.1g of Polyvinyl pyrrolidone (PVP) was dissolved in the suspension liquid under magnetic stirring. Soon after, different amounts of HAuCl<sub>4</sub> solution was added dropwise and stirred for 1 h. The final black products were washed with distilled water and absolute ethanol.

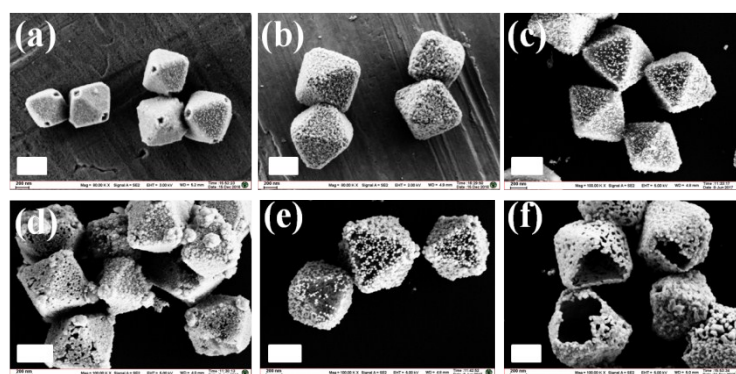

**Figure S1** SEM images of the obtained Cu<sub>2</sub>O/Au nanocomposites under different counts of HAuCl<sub>4</sub> solution (24 mM): (a) 100μL, (b) 200μL, (c) 300μL, (d) 500μL, (e) 1 mL and (f) 1.5 mL. The bar is 500 nm.

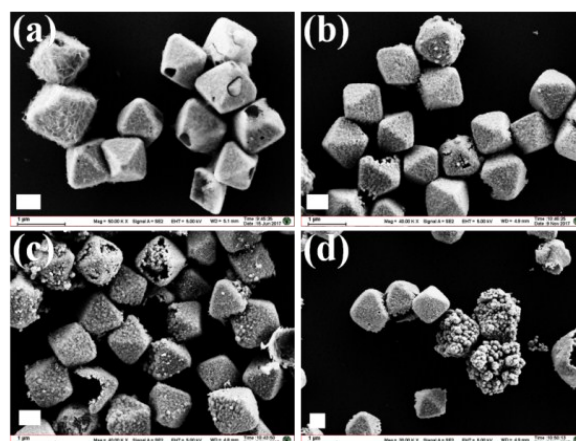

**Figure S2** SEM images of the obtained Ni-introduced CuAu nanocages under different counts of Ni<sup>2+</sup>: (a) 0.01 mmol, (b) 0.02 mmol, (c) 0.03 mmol and (d) 0.04 mmol. The bar is 500 nm.

The UV-vis spectra of the as-synthesized nanostructures were shown **Figure S3**. Pure octahedral Cu<sub>2</sub>O have multiple absorption bands at ~530 nm, ~600 nm and near-infrared regions ~750 nm, which is attributed to the absorption and light scattering of Cu<sub>2</sub>O nanocages, and the positions of these absorption band are in close agreement with the Cu<sub>2</sub>O polyhedron with large size in the previous reports<sup>1-2</sup>. After the AuCl<sub>4</sub><sup>-</sup>

was added, the absorption bands appeared at  $\sim 575$  nm and red shift at  $\sim 830$  nm can be attributed to the plasmon resonance of the Au nanoparticles<sup>3-4</sup>. The UV-vis spectrum of as-obtained Ni-introduced CuAu nanocages was also shown, a new broad absorption band appeared at  $\sim 600$  nm corresponding to the plasma resonance absorption of Cu nanoparticles<sup>5-6</sup>, and since the Cu and Ni nanoparticles were covered the Au nanoparticles, the absorption bands of Au became very weak. The whole UV-vis spectra also verify the formation process of products.

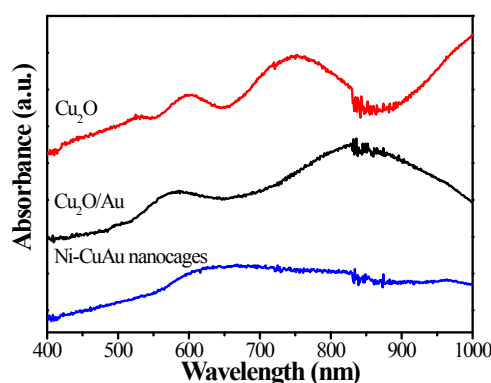

**Figure S3** The UV-vis spectra of as-prepared products.

The SEM, EDS analysis and element mapping of Ni-introduced CuAu nanocages under minimum and maximum  $\text{Ni}^{2+}/\text{AuCl}_4^-$  were also shown. **Figure S4** depict the characterization of two products under different amount of  $\text{Ni}^{2+}$  and  $\text{AuCl}_4^-$  (0.01 mmol  $\text{Ni}^{2+}$  and 500  $\mu\text{L}$  of  $\text{AuCl}_4^-$ , 0.04 mmol of  $\text{Ni}^{2+}$  and 100  $\mu\text{L}$  of  $\text{AuCl}_4^-$ , respectively ). As shown, the octahedral morphology of two products were still retained, the EDS analysis and element mapping clearly confirm that the content of  $\text{Ni}^{2+}$  and  $\text{AuCl}_4^-$  is different. From EDS analysis, the atomic proportions of Ni vs Au are about 0.84:3.68 and 17.88:1.05, respectively. Thus, the metallic atomic proportions of products can be general adjusted easily by controlling mass of  $\text{Ni}^{2+}$  and  $\text{AuCl}_4^-$ .

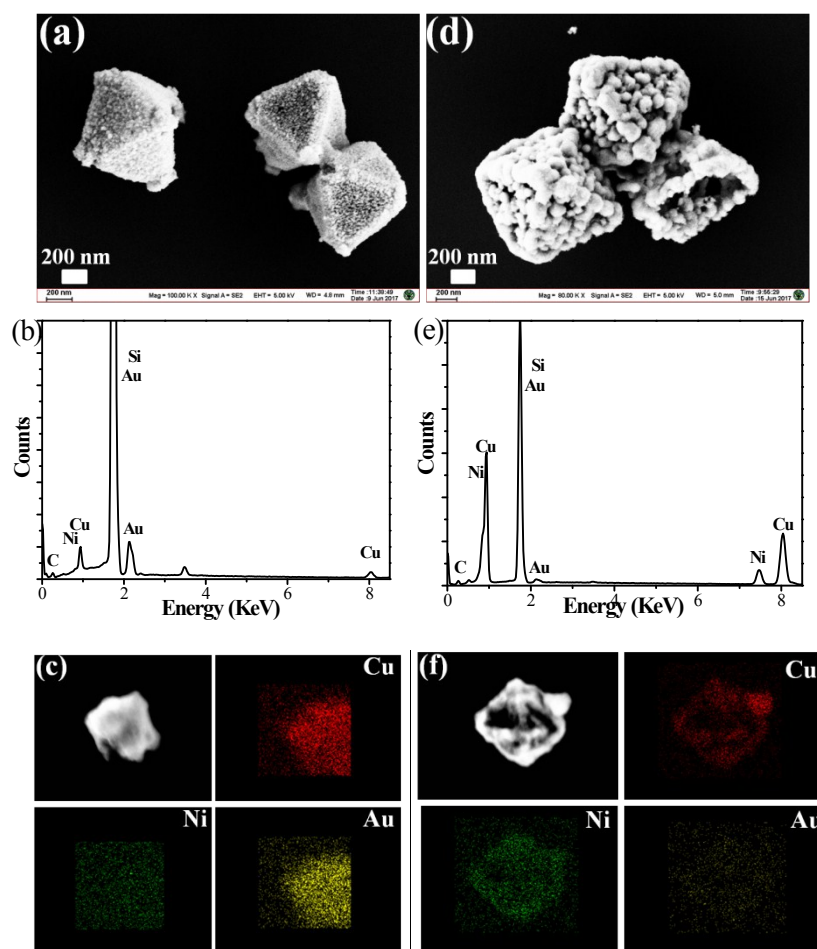

**Figure S4** The characterization of products under 0.01 mmol  $\text{Ni}^{2+}$  and 500  $\mu\text{L}$  of  $\text{AuCl}_4^-$  (a) SEM, (b) EDS analysis and (c) element mapping. The characterization of products under 0.04 mmol of  $\text{Ni}^{2+}$  and 100  $\mu\text{L}$  of  $\text{AuCl}_4^-$  (d) SEM, (e) EDS analysis and (f) element mapping.

The corresponding contrast experiments of the catalytic activity under different products were are displayed in **Figure S5**. As shown, the initial octahedral  $\text{Cu}_2\text{O}$  templates also have certain catalytic activity for the reduction of  $\text{H}_2\text{O}_2$ , but the catalytic activity of  $\text{Cu}_2\text{O}/\text{Au}$  nanocomposites is superior than pure  $\text{Cu}_2\text{O}$  templates, which can be attributed to the presence of Au. Compared with  $\text{Cu}_2\text{O}/\text{Au}$  nanostructures, the catalytic activity of CuAu is better, which can be attributed to the formation of Cu. In addition, judge from the peak intensity at 652nm after 15 min, the catalytic activity of as prepared products without  $\text{Ni}^{2+}$  is closely to Ni-introduced CuAu nanocages. Thus, in our opinion, Cu and Au in products act as main active sites for the reduction of  $\text{H}_2\text{O}_2$ , and Ni element in products mainly provides magnetism for the cyclic utilization of catalyst.

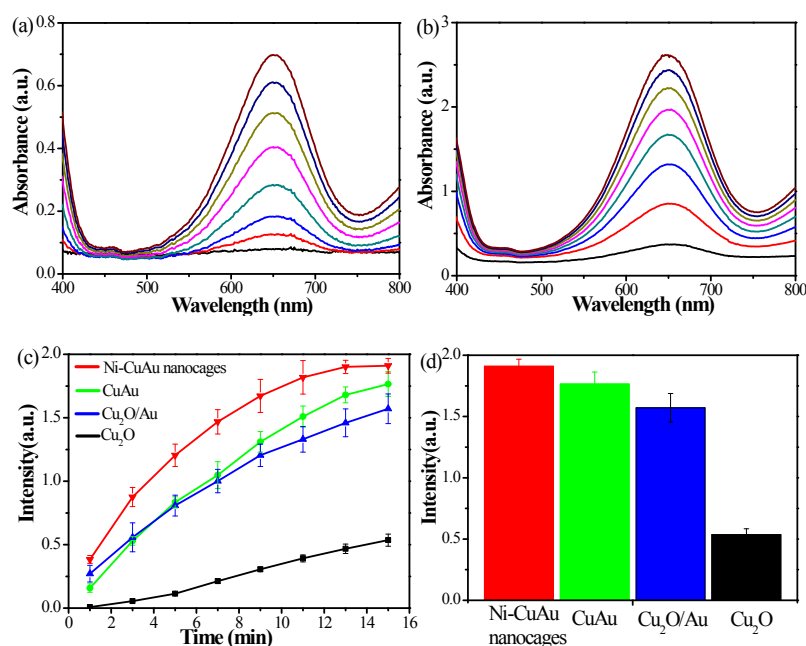

**Figure S5** (a) UV-Vis absorption spectra of the octahedral  $\text{Cu}_2\text{O}$  templates- $\text{H}_2\text{O}_2$ -TMB system at various reaction times. (b) UV-Vis absorption spectra of the CuAu- $\text{H}_2\text{O}_2$ -TMB system at various reaction times. (c) Performance comparison of different reaction systems at various reaction times. (d) Histogram of the peak intensity at 652 nm of different reaction systems after 15 min.

## Reference

1. C. H. Kuo, C. H. Chen and M. H. Huang, *Adv. Funct. Mater.*, 2007, **17**, 3773–3780.
2. X. W. Liu, *RSC Adv.*, 2011, **1**, 1119–1125.
3. M. Pang, Q. Wang and H. C. Zeng, *Chem. – Eur. J.*, 2012, **18**, 14605–14609.
4. H. Zhu, M. L. Du, D. L. Yu, Y. Wang, M. L. Zou, C. S. Xu and Y. Q. Fu, *Dalton Trans.*, 2012, **41**, 13795–13799.
5. Y. Zhao, J. J. Zhu, J. M. Hong, N. Bian and H. Y. Chen, *Eur. J. Inorg. Chem.*, 2004, 4072–4080.
6. S. H. Wu and D. H. Chen, *J. Colloid Interface Sci.*, 2004, **273**, 165–169.
